# Supplementary material for: Soil health and nutrient density: preliminary comparison of regenerative and conventional farming
Source: PeerJ journal article supplement (doi:10.7717/peerj.12848), 2022-01-27
Supplement: Supplemental_File_2.xlsx [file Supplemental_File_2.xlsx]

## Sheet: Sheet1
Wheat Mineral Density comparison
Mineral	Cover Crop 1	Cover Crop 2	Cover Crop 3	mean (CC)	(±) Sd	No Cover 1	No Cover 2	No Cover 3	mean (NC)	(±) Sd	CC/NC
Li	0.01	0.01	0.01	-	-	0.01	0.01	0	-	-	-
B	0.9	0.93	0.87	0.9	0.03	0.77	0.58	0.59	0.64	0.1	1.40625
Na	13.01	12.49	13.86	13.12	0.69	13.17	16.41	10.14	13.24	3.13	0.990937
Mg	1379.97	1485.82	1450.41	1438.73	53.88	1315.32	1052.05	969.21	1112.19	180.72	1.2936
K	6998.65	7281.22	7376.71	7218.86	196.59	6902.11	5260.44	5086.32	5749.62	1001.87	1.25554
Ca	30.21	34.72	32.57	32.5	2.26	26.4	20.17	19.19	21.92	3.91	1.48266
Cr	0.01	0.01	0.01	-	-	0.01	0.01	0.01	-	-	-
Mn	48.2	55.35	49.32	50.96	3.84	48.01	35.87	29.11	37.66	9.57	1.35316
Fe	39.41	41.49	41.44	40.78	1.19	40.91	31.32	30.08	34.1	5.92	1.19589
Co	0.01	0.01	0.01	-	-	0.02	0.02	0.01	-	-
Ni	0.21	0.2	0.2	0.2	0.006	0.37	0.28	0.25	0.3	0.06	0.666667
Cu	2.41	2.73	2.53	2.56	0.16	2.63	2.03	1.86	2.17	0.4	1.17972
Zn	19.68	18.67	18.64	18.99	0.59	15.78	10.78	10.09	12.21	3.1	1.55528
As	0	0	0	-	-	0	0	0	-	-	-
Se	0.01	0.01	0.01	-	-	0.01	0.01	0.01	-	-	-
Mo	0.29	0.18	0.18	0.22	0.06	0.06	0.05	0.05	0.053	0.006	4.15094
Cd	0.02	0.02	0.02	0.02	0	0.03	0.02	0.02	0.023	0.0058	0.869565
Pb	0	0	0	-	-	0	0	0	-	-	-
green = higher mean value
red = lower mean value
